# Supplementary material for: Exometabolomic Analysis of Decidualizing Human Endometrial Stromal and Perivascular Cells
Source: Front Cell Dev Biol. 2021 Jan 28;9:626619. doi: 10.3389/fcell.2021.626619 (PMC7876294; doi:10.3389/fcell.2021.626619)
Supplement: Supplementary file 8 [file Table_2.XLSX]

## Sheet: Table S2 Metabolites detected i
Table S2 Metabolites detected in Untargeted Analysis of PVC and EnSC conditioned media and their corresponding signal intensities
			Sample Number	1	2	3	4	5	6	7	8	9	10	11	12	13	14	15	16	17	18	19	20	21	22	23	24	25	26	27	28	29	30	31	32	33	34	35	36	37	38	39	40	49	50	51	52-2	53	54
			Cell Type and Day	SUSD2+ Con	SUSD2+ D2	SUSD2+ D4	SUSD2+ D8	SUSD2- con	SUSD2- D2	SUSD2- D4	SUSD2- D8	SUSD2+ Con	SUSD2+ D2	SUSD2+ D4	SUSD2+ D8	SUSD2- con	SUSD2- D2	SUSD2- D4	SUSD2- D8	SUSD2+ Con	SUSD2+ D2	SUSD2+ D4	SUSD2+ D8	SUSD2- con	SUSD2- D2	SUSD2- D4	SUSD2- D8	SUSD2+ Con	SUSD2+ D2	SUSD2+ D4	SUSD2+ D8	SUSD2- con	SUSD2- D2	SUSD2- D4	SUSD2- D8	SUSD2+ Con	SUSD2+ D2	SUSD2+ D4	SUSD2+ D8	SUSD2- con	SUSD2- D2	SUSD2- D4	SUSD2- D8	SUSD2+ Con	SUSD2+ D2	SUSD2+ D4	SUSD2+ D8	SUSD2- con	SUSD2- D2
			Matching Sample identifier	1a	1a	1a	1a	1b	1b	1b	1b	2a	2a	2a	2a	2b	2b	2b	2b	3a	3a	3a	3a	3b	3b	3b	3b	4a	4a	4a	4a	4b	4b	4b	4b	5a	5a	5a	5a	5b	5b	5b	5b	7a	7a	7a	7a	7b	7b
Compound	Compound Name	HMDB ID	Delta	Signal Intensity
278.1518@6.0244184	Alpha-CEHC	HMDB0001518	9e-06			23447	21539						20088	32607	40385		21682		36613				30487				30882				33492				26038				31657			17016	27670						19297
136.0388@0.5867088	Hypoxanthine	HMDB0000157	0.000289	32430		150197	68893	59819	46274	88404				104795	57946			68212		45583	52853	196198	53199	41960		107318				46610	85579			93214	40531			85725	57329			67263		36444	31328	39322	20958	32081	37734
329.0522@0.58262295	Cyclic AMP	HMDB0000058	0.00032		44794	75403	86558		40252	34790	56027			27522															46028	41381	89940		73842	106428	29871		41976	32786	39604		32219	41077	33687		35716	58518	29923		69800
165.0793@0.87172407	L-Phenylalanine	HMDB0000159	0.000321		15984172	17522272	17012372		19961150	13303185			16768768	16788876	16297534			9899819	10570308		14151524	14709045	15737797			13397601	13800917		10620459	14070079	12212381		12403182	14602361	12350111		13244080	13930046	11734664			12514472	12470595		10710729	12148513	12650942		11571850
177.0786@0.83460015	1,2-Dehydrosalsolinol	HMDB0012490	0.000379	166764	92248	113182	117540			60138			75949	132478			64728	112224	117633		85649		32187			94268	69070		107617	115678	133812		101427	144166			93535	38960	98400			63567			84800	124343	106182		101949
236.0793@0.8910606	N'-Formylkynurenine	HMDB0001200	0.000407		39500	36527	42209		43169	38049	33602		32469	33147	37949		41718	41209	42344		36466	33717	54496			40933	43933		27282	28554	33569		31446	34416	32228		29142	26576	28391		42726	30796	31368				27984
399.1456@2.1779048	S-Adenosylmethionine	HMDB0001185	0.000536	27972							40627	119268	211770					44686	22087			39848	30250					19010					33236		26474	24343							24213	33213		19059		42997
220.0589@3.1435983	3-Hydroxy-3-carboxymethyl-adipic acid	HMDB0059775	0.000597	111090	146923	93515	28283	102980	121204	91973		95313	135534	110030	48160	104880	125758	101885	47612	96494	129608	99682		114939		80794	23602	64221	64924	101810	74261	61433	86668	103849	42489	55284	96920	97758	34644	93790	85798	83985					71746	116183	99222
236.0791@0.81637	Formylkynurenine	HMDB0060485	0.000607	35270	39456	30871	26227	45252	25824	27720	30986	56141	27390	31058		40060	33179	44634	44865	38786	34689	25213		37279				40412	45349	39602	39687	43881	29573	40076		44265	48109	23324	30382	42863	24880			27700	27261	36642	33960	25428	29805
380.1036@3.36684	Meticillin	HMDB0015541	0.000607		31299			16887	27727	39311	46719	19796	26142	14796	57569	16761	17442	21933	35762		16165	16376		16314		32629	38716	14931	25667	16902	26610	56559	41029	33271	44451	33000	17351	34970		51360	40411	45265	77879	793683	129860	66575	1605108	119831	338154
386.2464@6.202488	12a-Hydroxy-3-oxocholadienic acid	HMDB0000385	0.00069		1261917	1840866	1558702		1614594	1561880	881861		1488456	1274181	1344165		1701963	1676845	1218354		1108292	1526225	1406598		11059	1191990	1284179		1091179	1980701	1739635		1463774	1775863	1306083		1408416	1465059	1457558		1323624	1815106	1259697		1135953	1289415	1221685		1150752
334.098@2.9987228	Penicillin G	HMDB0015186	0.000728	27456	70177	106384				80602	53895		33502	31078				31849	37653		26457	31727				43869		13515	16445	27769	27783	11807	22285	26546		14889	18784	30248		17841	17091	25959		105945	62453	76598	205790	95971	118691
215.1512@3.5835	N-Nonanoylglycine	HMDB0013279	0.000944	15077		34691	54846		19706	27162	28557	60415		13721	17401	31662	43952	45510	19417	25330	23003		15978	13060			31367	40886	15589	39520	423678	83056	17652	37196	35351	22306	21704		14571	21396			14547	16210		8638	31665
282.0953@0.74048394	1-Methylinosine	HMDB0002721	0.00112			58164																					57732								62206								85575				55007
281.2707@7.8985357	Oleamide	HMDB0002117	0.001165	47529	58933	85994	69199		85579	292207	1868293	37672	83815		83327	46254	283735	30588	36880	62684	68521	32414	114865	57124	15569		87524	56153	115419	30567		105231	25022		183401	627814	83119	59168	33077	38768	1369442	31227		45109	174508	65787	60565	60234	20374
342.2177@4.9237614	17-Hydroxymethylethisterone	HMDB0060710	0.001795			10861	16682							10172	19633				13468				16704				16433			12658	18180			12110	19891		9860		27229			17292	29826			9773	11877
145.0719@0.5995	(S)-5-Amino-3-oxohexanoate	HMDB0012131	0.001993				31167				24237								31854								34448								39331												41009
169.0527@1.5610762	Phosphodimethylethanolamine	HMDB0060244	0.002306	116074	107703	113245		124537	98848	97360	69014	92544	104193	87590		133708	135034	15971		116427	122331	84328		115329		90486	10152	117152	84590	93802	86084	114728	16903	94507		95524	88190	83225	65632	101795	80514	80208		78424	84521	15345	75309	97270	100576
397.0587@0.65318185	5-Taurinomethyl-2-thiouridine	HMDB0011610	0.002656			108111	113699								67087				49141			44673	121576			31425	72691				39615				52642			44880	65607				67747			29229	89048		37307
311.1263@1.0843334	N2,N2-Dimethylguanosine	HMDB0004824	0.003331		91733			158875								63347																														278765	189516	254809
252.0814@0.58253485	Deoxyinosine	HMDB0000071	0.004455		8961	65566	15117					10094		20921	11939	11269		11618				27926	9726				7533	9129	8957	8955	14847	11321	9911	22256	9132	10551	7751		9303
630.1477@3.6164258	CMP-N-glycoloylneuraminate	HMDB0012206	0.005518			154448	348854			29739	71404				83720				100603			17228	196485			26262	228348				75557				142701			39259	163282				152024				78012
264.1166@0.5954117	di-Hydroxymelatonin	HMDB0061136	0.005593	19328	18402	21575	57335	27336	17049			21612	14928			23123	21067			22519	16833	15706		19959				19619	17167	17996		17394				19382	16116							28694
278.0935@0.7417895	Isovalerylglucuronide	HMDB0002091	0.006668				51031								64190				62976				44779				57600								36047				28075				53914					33388
275.0945@0.62623084	Ethenodeoxyadenosine	HMDB0001786	0.007339				82733				24710				66146				73643				43053				164921								84068								117467
489.1229@2.5223129	Chondroitin 6'-sulfate	HMDB0060453	0.007675	20687	26703	30114	27045	26335	24442	23697		25365	24865	24501	22666	28193	21685	26575	26443	25780	23153	19144	18101	23806		20782		21646	22251	25348	25068	25211	19954	21011	12754	18913	20527	17198	14502	20871		14401		21399	23095	27394	21002	22286	25645
633.4447@6.7921576	PE(14:0/14:1(9Z))	HMDB0008822	0.007745		19931	29961	64495		17985	20902	29826	28574	31924	14140	65420	11993	36301	19607	46289	26596	18367	27259	88048	43237			51063	11916		24765	53082	76916		30239	47984	28288	21556	18383	19901	11078	67833	39836	22599	14595	17504	30874	83542	29775
721.4965@6.7446947	PE(P-18:1(9Z)/18:4(6Z,9Z,12Z,15Z))	HMDB0011445	0.00814			14269	33969				15254	17352	15029		40208		17534		23188	12506		11819	47448	21845			24396			9810	30189	39060		13809	25856	15225	9202				32894	19866	10193			15008	45070	13458
262.0888@0.80890197	L-beta-aspartyl-L-glutamic acid	HMDB0011164	0.008399		225000	202875	224665		184567				199645	244483			273829	259460	295502		277906	266267				246820			253025	315590	309432		311803	308948			317104		301486			286076	298114		349031	361200	340481		371612
131.078@1.5602119	Creatine	HMDB0000064	0.008523	17267	17072	14754			20376	12556		14425	14037			14301		15332				12603	13199	15495				14384	12083	12104			12309	10323			13405	13478		16970					13387		10301	16519
428.2021@4.7556715	Pyridinoline	HMDB0000851	0.011386	24582	21429	22019		22138	25859	22881	17047	23185	22377	21741		23703	27580	23758		24250	23156	24002		26065		21320	22654	25077	21722	21937			24772	22419	22751	20217	23589	24774	20515	23017	21482		20857	22252	22934	23445		26178	20156
326.2241@6.202444	2,3-Dinor-8iso prostaglandin F2alpha	HMDB0062618	0.014776		76173	110721	91100		96363	91123	53913		88784	74861	78146		100860	99374	72640		73001	88852	84710			71441	74102		65018	118529	101472		84609	104702	77126		86239	84610	87192		78064	104623	73938		66090	77183	72026		65538
148.0524@0.87138593	L-2-Hydroxyglutaric acid	HMDB0000694	0.015227		126216	141409	135509		137274	100058			135100	129655	125225				77464		107361	110832	124763			102102	106629			110035	91347		94943	113085			105756	106694	84559			97082	94503		80870	92834	95915		83421
102.0473@0.87076676	2-Ketobutyric acid	HMDB0000005	0.015606		92582	99854	93541		101082	72151			99662	94180	90129		53329	52434	55608		76281	81151	87640			70257	74844		56809	79335	66852		73547	78884	64221		70921	74913	63044			66177	68993		64736	66836	67758		61437
119.0741@0.8712105	L-Threonine	HMDB0000167	0.015857		3414040	3645187	3506246		3790193	2629236			3563868	3429542	3511349			1838315	2139676		2967752	2983435	3372971			2731132	2883179		2106561	2843136	2416230		2300543	3014699			2755973	2942883	2335814			2538841	2524868			2447419	2387556
280.0878@2.462915	Phenylalanyl-Aspartate	HMDB0028991	0.018122		38094	93378	125437		29960	46899	60398			26620	50747	21079	22817	35275	70475			43156	78619	23521		34670	93577	24353		39280	70348	26152	22852	41525	81584	24394	27745	46808	76303	25432		27001	75343				81973
274.2481@7.213689	Androstenol	HMDB0005935	0.018434		15513	16643	15668	13406		29104	17601	25992		20069	14272			16164	14456			16070	14763	13707	13879	16405	13305			15697	17372	16200	17153	22416		14763		11066	16126	15530			17859	14798	12547	14970	13461		14276
167.114@0.6292778	p-Synephrine	HMDB0004826	0.019371											46278																				37472	14591
550.0795@1.5275483	UDP-L-rhamnose	HMDB0012305	0.019394		60984	388362	632917			36197	111661		65492	291292	326584			134201	484027		53285	72982	71429			128237	217579			62298	429623		33093	130361	51283		29481	30015	324135			44839	123356			141100	169159		79371
453.1028@3.3651888	(beta-1-O-[N-(2-hydroxymethyl-3-chlorophenyl)-anthraniloyl]-D-glucupyranuronic acid)	HMDB0060033	0.020141	926872	942889	196025	46860	1092633	773155	335035	82596	1668645	1634128	1110942	341419	1902324	1865313	907766	275494	1770748	1688165	757990	207072	1719398		600781	168504	1602758	1409317	1090270	365368	1507681	1509074	964434	194714	1166539	1222558	527244	181483	1282673	1018830	824347	148502	189754	200260	145931	103247	152927	112866
453.103@3.4681427	(beta-1-O-[N-(2-methyl-3-chlorophenyl-5-hydroxy) anthraniloyl]-D-glucupyranuronic acid	HMDB0060036	0.020141	288440	301241	58003		353500	243251	96698		528902	505629	341650	102011	590920	583216	284847	87637	556329	510866	227964	62063	514274		183776	47548	494906	439633	348268	112377	474523	472664	296882	55929	367753	396118	158514	56470	401182	311442	242525		57274	53728	42400	30702	44680
194.1149@1.0572022	3-Hydroxyphenyl-valeric acid	HMDB0041666	0.020606		104888456	112517312	113303096		106487528	99425136	84733440	61719	113995120	112590120	112957136		88393216	86910528	88121040		102104344	99672016	94598432			46866692	101729200		44173348	95807936	97785600	55617	100003000	100223760	95866080	63028	93870256	46627668	98901456	71753	84984584	45425964	93215456	72418	92003968	96167448	92271584		95671616
469.0922@1.5630448	2-(a-Hydroxyethyl)thiamine diphosphate	HMDB0003904	0.021018	96858	137130	145414	120198	126531	108247	104408	65705	127701	118828	106207	95040	126265	111141	115856	109874	105013	116502	103475	86978	115634		98741	82001	114830	101624	102375	95259	119438	112836	99045	83993	101524	111973	105045	94198	98063	72001	90421	63803	107402	112132	125515	118254	118295	108253
299.1939@2.2978332	2-(3-carboxy-3-(trimethylammonio)propyl)-L-histidine	HMDB0059617	0.02197	25774								15020																																21492
575.4177@2.979493	LysoPC(22:2(13Z,16Z))	HMDB0010400	0.02261	12228	12361	29075	8633		12076	20047	11256			13726	13795			20767	9743			10460				8088	12283			12828	6419		9064	15107				20091		8590		11304			46339	45426		6212	10551
330.1966@3.643794	17-Hydroxyprogesterone	HMDB0000374	0.022895			35882	59334		32288	39599	41691																	15946		22351	62797	22918	18643		101694		30457	22094	23514	26739			38718				39085
266.1643@6.1713476	Tetranor 12-HETE	HMDB0060055	0.023895		13353	11498	12039		15513	18996		22441	12842	13917					10834		15329	13365	14195				12546		12401	13195	15590		11815	13515	17882			19849				45684	33372		13367	12248	14622
409.1304@3.2458222	dermatan L-iduronate	HMDB0060470	0.028011		64813							80566					64078							60643						60407						52534								239304	374303	381282	97513	320157	233818
381.0985@3.540464	N-Acetyl-9-O-lactoylneuraminic acid	HMDB0000768	0.028611						29570	36137	87079																					78287	19366			16780	20052		99825	146365	55727	52479	180080	124500			327372		97196
677.4704@6.768448	PE(15:0/16:0)	HMDB0008890	0.029155		14780	22444	49406		12559	15553	22251	23315	24097	11064	57302		26622	15052	35603	20388	13194	20711	70684	32285			36952			17883	42818	59432		22464	37886	21945	13887	13132	13171		51348	29686	16731		11769	22597	69024	22018
222.0379@2.8685696	Cysteinyl-Threonine	HMDB0028785	0.029528	26950			84050		61369	74013	137501	14983							35312				18300	11654		78963	15957	88095	104995	68284	48344	318151	156366	113683	132899	260962	245326	99462	219226	247458	169562	200003	277752	94512	19976		198749		46678
480.2043@2.7452185	11-Oxo-androsterone glucuronide	HMDB0010338	0.031633	75959	97269	79931	57635	61505	69233	54352	30982	131067	105152	104034	110078	111907	128342	118548	102420	87747	86244	84970	96683	107603		91155	86164	121720	94990	133430	123497	113424	127029	127619	110189	101891	122349	123144	114356	112849	76798	104860	94924	42056	57841	593506	22072	49556	37941
965.2441@4.1521664	(S)-3-Hydroxydodecanoyl-CoA	HMDB0003936	0.033088																																												60259
159.0353@3.9084318	Indoleacetaldehyde	HMDB0001190	0.033114																																									28704	95535		64231	103309	55110
301.2608@5.706843	Nonanoylcarnitine	HMDB0013288	0.035492	30479	30960	36867	93166	22266	32476	33310	26848	35025	32291	30723	68090	27682	37769	32201	68590	31046	38471	32736	70905	38527		14671	36961	22077	18923	23742	42539	71208	25298	24472	31071	20842	38744	29248	18684	30558	36915	40555	20710	31699	31116	31266	72486	29676	16543
197.1407@3.5827696	Metanephrine	HMDB0004063	0.035507			24564	39062			22809	19413	46558				23315	33762	34936		18251							24930	30817		28313	302422	63061		25767	29244												21080
402.2401@4.6982107	7b-Hydroxy-3-oxo-5b-cholanoic acid	HMDB0000541	0.03691			11718	15936							10082	15777			9075	12525				14738			8516	14840			11905	19743			13181	18540		11236	13829	26359			15155	26559				11150
201.0995@1.0614748	Capryloylglycine	HMDB0000832	0.036993	76509	81361	193989	223380	182056	81537	115749	169331	218282	228224	310047	75814	145766	53942	276251	78216	39497	61606	102719	98649	58639		166947	74394	48860	189386	188556	163892	239345	218895	254371	73188	282029	63927	80835	153407	144813		48273	241203	313383	80549	276674	84223	114823	249089
259.9915@2.3846438	Dolichyl phosphate D-mannose	HMDB0000994	0.038219	52742		152826	156663			82266	36060				69732				96128			57986	117216			53307	131840				105269		32611		116368		33939	96148	113735	47294		59440	108184		34775		43137	40903	55102
212.9643@2.0059102	L-Aspartyl-4-phosphate	HMDB0012250	0.039538		214217	383245	533564		201888	265904	309032		303202	420916	1012319		161835	281097	521815		258499	486978	954823			404767	635385		212778	337741	571854		196241	288450	451441		252154	373653	548535		190407	314767	392141		287822	419817	552022		305394
213.9483@1.4653895	2-Oxo-3-hydroxy-4-phosphobutanoic acid	HMDB0006801	0.039554		241433	630490	1452007		212771	355082	619753		412222	646920	2247612		172259	387908	904663		189198	629894	2027669			647785	1934477		75683	199288	571022		92671	233573	953876		171681	446331	1240112		188986	540006	1624323		108000	249220	629121		241999
345.0073@2.006316	Guanosine 2',3'-cyclic phosphate	HMDB0011629	0.040134		1411446	2478190	3224725		1346002	1727448	2080040		2103897	2649452	5445658		1140890	1861613	2970804		1665219	2957841	5272936			2525684	3648292		1440891	2139549	3450934		1313296	1934011	2837581		1655339	2407513	3397942		1366407	2106789	2488125		1964375	2683019	3336592		2015693
238.14@1.9557648	Tyrosyl-Glycine	HMDB0029105	0.044643	53917	61075	64584	50038	55538	54328	46430		56396	49888	45874	41708	56635	51012	52125	46555	49680	54734	47751	41095	54018		40277	36922	51847	48127	54236	46691	52080	49920	50222	37178	44602	47898	44943	41101	50753		38818		46398	50509	53158	49265	53053	49119
212.9646@0.9270143	Indoxyl sulfate	HMDB0000682	0.044978			832703	843485		793087	710690	695831		796912	829897	763365		645383		654934		715243		677651				730046		714517	747335	749265		732136	785847	639907		707790	678878	736335		623078	667065	683691		688789	707011	669891		573639
616.1321@3.4118087	Heme	HMDB0003178	0.045198			29744	46019								15049				20805				29134				32095				14148				22699				22808				23869			22003	85227		45854
499.1344@1.0596857	Isorhamnetin 4'-O-glucuronide	HMDB0041757	0.048509	50050				55817				54036				58327	24562		20841	52470		18765		50472				53517				54429			21676	46058				54126				41930				46529
963.2115@3.14346	3-Oxododecanoyl-CoA	HMDB0003937	0.050038	16134	17969	10153	9980					18691				12889								14884									9736			8925	14616										21920
298.012@4.8713484	N-Acetylserotonin sulfate	HMDB0060834	0.050342	41645	110000	335808	454393	44865	125398	270575	275202		104339	175764	447693		79679	235090	441662	44877	92920	288291	447793	39255		263911	402854		23799	97638	300255		30935	135544	324324		53504	192245	368856	32861	59899	181490	330577		31968	113976	277022	56764	111956
441.3975@8.371304	3-Hydroxy-9Z-octadecenoylcarnitine	HMDB0013340	0.052076	34564	23167	24272	29057	23437	30477	30632	29797	22768	29528	28518	30489	27042	35126	31121	25669	32479	33597	34363	31535	28388	41550	32205	29116	29096	27815	25860	28820	25816	29347	27387	44601	22928	24548	37876	30191	26856	35643	37460	33272	29498	29841	29386	25525	38870	27177
343.2197@2.4805562	Dodecanoylcarnitine	HMDB0002250	0.052559								31892	98597	124384									35431	21084			21967																				23750		31713
341.0785@3.1430714	Lactosamine	HMDB0006591	0.053696	106839	139702	96099	28443	103124	115705	88772	30139	95222	126295	111011	43732	106551	118760	100431	47001	93736	125713	97150	24450	108051		80358	26524	59096	62414	106081	75548	63313	88921	106344	39901	55582	89564	90057	33385	93275	83245	80165		50053	94836	130610	68473	123003	116809
347.9881@1.463262	Inosine 2'-phosphate	HMDB0011681	0.059		21317				18192	30752			47140	54333				34657				51099				50032				15713	39057			21634				36874				41495				19118	48471		17532
275.964@0.96793175	6-Phosphogluconic acid	HMDB0001316	0.060633		24977		24727		195845	204254				25668				217294	30488			141709				21715			193268		178109				159670						120565	23675	118438		185602
683.196@11.866726	(6S)-6-beta-hydroxy-1,4,5,6-tetrahydronicotinamide-adenine dinucleotide	HMDB0059644	0.060664	774708	1420745	2178135	1132390	711631	937247	471373	2869586	462800	847430	916875	1323274	1328337	487288	1747503	858651	1178751	1482334	918398	425378	705565	786366	643602	1008731	385657	2487032	4243748	1012875	489694	2344452	1750252	576050	1679555	709620	481925	567469	1772245	772348	290050	777890	2369713	827132	535135	278648	287834	362432
535.1577@9.83338	Lipoyl-AMP	HMDB0059635	0.061659	200647	402740	783973	398140	219760	282630	99941	725203	64119	260634	281063	264793	392433	106352	623633	236511	349739	336321	249540	92585	199388	162037	162709	274963	68830	831987	1440666	363144	112982	1020956	648972	88205	421505	146035	99884	141259	601639	142677	40246	177160	898013	219689	116180	21276	37106	66757
601.1498@2.561085	O-acetyl-ADP-ribose	HMDB0059656	0.067562		17324	139138	187052			23983	27134			13987	73351			12196	35893			21473	80520			20570	56362				35277				45449			24097	70077			16167	58449				16924
883.1938@3.1718967	Malyl-CoA	HMDB0001021	0.067633	11219	16773							13780				11904	15413	14673						8861																				18942	13727	15414	14618	13982	13565
453.1507@3.414966	20-Oxo-leukotriene E4	HMDB0012642	0.067809			26745	27322								38009				34009				34303				34623				38244				44633			32676	45416				37421				25306	12713	12488
211.1565@3.9385552	3-Methoxytyrosine	HMDB0001434	0.072042			104647	130841		59770	97049	83976	181834				91849	69386	64933					50385					69628		112662	1005606	205944		55786	126967		57830			54943							61643
287.282@4.83998	L-Octanoylcarnitine	HMDB0000791	0.072342	107297	190150	317659	4130843	133161	194597	681004	1316853	112376	74534	217050	2545482	241385	204812	455590	1583545	138782	218309	175951	2363457	304170	34703	111128	806939	307716	561494	1279245	3128775	5773876	677228	611443	580975	647173	1514556	927359	470643	339503	4063251	1931834	447227	96191	74717	200061	6119498	149699	70547
336.1469@4.2830806	S-Nitrosoglutathione	HMDB0004645	0.07293	18888	11307			15770	22527	26464	21292	13187	18225		14659	14904	15554	12535		18459	14741			13394		19132		22879	20083			28460	22340	12413		25056	22834	15365	19821	27423	21693	27127	24262
304.1237@3.1605003	Thymidine 3',5'-cyclic monophosphate	HMDB0001570	0.077663			62834	236743			23307	56390			13798	151506			21781	128348			27164	216996			32366	249205				48566				111222			22543	137784			20479	267584
501.3658@6.8640943	LysoPE(20:4/0:0)	HMDB0011518	0.080261	13566	19649	25285	51411		17788	25622	27344	21553	24118	16633	48349		31961		31854	25744	17357	25389	60929	36760			43529			23721	49363	56384		28068	40300	26671	20756	17025	17427		61393	34559	23118		18219	28070	53243	29328
457.3389@6.8806386	10,11-Dihydro-12R-hydroxy-leukotriene E4	HMDB0012501	0.089091		16784		34676		13700	19852	22198	16908	19192		35126		26046		23122		12726	19656	45506	28241			31591			17201	34592	43240		20801	26590	19828		13245	14554		46344	24634	19177		13437	20099	34980	20554
359.0214@4.7543044	Epinephrine glucuronide	HMDB0010336	0.100231	37875	36784	39129	37096	37272	37671	34615	29784	38157	37042	36902	35245	38931	39310	38222	44113	34190	35814	37408	36347	37662		37201	36039	38012	36803	36601	39233	37126	38214	41112	39448	35872	45421	40269	39473	40308	35058	36954	34107	38708	34194	35559	37015	40766	38599
510.1231@2.4602172	Deuteroporphyrin IX	HMDB0000579	0.103605		24532	57697	153140		10814	16816	37282			33058	190829		30998	65381	204573			30186	184303			52226	210193				66103			37818	162007			37395	144041	32041	23787	55914	200933
470.1289@2.6343124	1-Phosphatidyl-1D-myo-inositol 3-phosphate	HMDB0003850	0.106242								55678																					26106							40338	63232	25473	25549	107881	103385			220972	21055	81653
760.1878@3.0755002	Bilirubin glucuronide	HMDB0010332	0.107773	41236	66433	243107	496177		35907	96980	197302	24856		75395	520342	19527	23834	190288	690009			105578	450595			174229	512859			42205	193513	17743	27724	84329	327884		33843	92632	249596	50558	34819	121967	269690	159047	291994	507201	908807	814027	1067821
634.121@1.1280344	Lactodifucotetraose	HMDB0006587	0.111029			76831	216819								78065				23598								67808				39791				61025				117200				115769				55389
455.1179@3.595094	20-Hydroxy-leukotriene E4	HMDB0012639	0.116259			19899	130362																65639				59147				18142				61275			17296	110889				180716	31177	25352	43522	233808	37462	54051
328.0215@1.1701086	Phenylalanyl-Tyrosine	HMDB0029007	0.120807	31716				42561				44693				39145				38864				37317				35481				41724				38216				38270				29731				27982
482.113@1.2137679	Thymidine 5'-triphosphate	HMDB0001342	0.123737	91181	115989	677615	1059956		51539	170126	212803		48954	141379	648505			87825	457963			246757	1355666			271545	565804			67823	273268		32166	100875	1064668		93893	441423	1603179	62144	89141	312143	1607393				89825
468.0997@0.5947948	Deoxyuridine triphosphate	HMDB0001191	0.126087			36879	52199							23414	49441				27605			22079	39630			23769	30549				44436			19099	45090			33779	67355		16802	34747	66306				23295
760.5197@2.9826517	SM(d18:0/20:0)	HMDB0012090	0.126125	40260	76220	932712	1756377		41951	82927	99699	29637	16635	64390	504135			62702	263720			104223	684125			108525	551480			33001	300841		35017	63825	520619		31359	173747	695751	18822	16340	72990	554656	134851	226804	636898	2178320	411245	620607
384.0764@0.763407	20-Trihydroxy-leukotriene-B4	HMDB0012643	0.138403	47275	33440	32522	27925	35171	46091	26367	19594	37947	26843	25038	16660	40269	31627	60636	31895	38545	30206	25884	14955	39126		26798	17472	40411	28368	30115	26762	35653	30780	30511	18760	31849	28307	27208	23652	40698	25586	25190	18904	30473	23072	29259	23914	32707	21420
755.8992@1.4710954	heparan sulfate alpha-D-glucosaminide	HMDB0060481	0.151512			48413																31933				46086					51665											23993
588.1379@3.0113065	D-Urobilin	HMDB0004160	0.156885			22397													16456																										24468	40731	73838	57177	90620
869.8443@0.9766279	PC(20:1/22:1)	HMDB0008316	0.156944			194984	216158		197529				196599		197974		155185		182699			192834	153237				180691				227108			183496	167252		228960		226568						207638		122959		230902
424.9726@1.6279374	Hyaluronic acid	HMDB0002061	0.180725				264429				151513				521947				152488								346750								169142				133585				243504
345.9902@1.4678063	19-Noraldosterone	HMDB0041795	0.187824		20455	62064	768629		17972	35358	92059		47517	56319	1092312			34313	95695		16882	168052	964666			80334	924441			15620	51321			21661	355373			44620	561022			57074	727608				83038		20877
753.9036@1.472857	Adenosine thiamine triphosphate	HMDB0013646	0.193887				162203				54496			61153	254958				109935				199579				205757								79748				152516				213370				76378
471.1129@2.5243552	Cervonyl carnitine	HMDB0006510	0.221959	168631	205301	224503	160878	184800	252209	222459	126272																21262
726.3902@5.754097	DG(20:5/24:0/0:0)	HMDB0007586	0.226026	13910	12742	17974	10430		15582	9641		55300	11416	9769	12029	19111	18763	8879	8391	20610	12325	27015	13536	30227			14833	15549		12281	10402	13156		18054		10447		9230	9765	10984	10496	10834		13429	16863	15924	9718	18345	11248
888.2503@3.1991472	PIP(16:)/18:0)	HMDB0009940	0.226209		9429							6986						8288																										18676	19968		13998	14861
870.2403@3.8637588	P1,P4-Bis(5'-xanthosyl) tetraphosphate	HMDB0003834	0.234175																																										139729	98000	75587
545.0946@3.7090218	LysoPC(20:3)	HMDB0010393	0.25294			43087	59403												21073				26676				31422												16059							13393	215653	31536	56451
440.1302@2.6338067	MG(0:0/24:1/0:0)	HMDB0011559	0.25636				11534		27347	33017	70215																					33945							56418	79957	36025	31065	146546	154913	16457		330030	32765	126565
735.217@3.088706	PE(22:6/14:0)	HMDB0009679	0.266905			9190																																						32958	57229	87713	77316	60631	72951
631.1443@2.9670115	PE(14:1/14:1)	HMDB0008855	0.276804	22372	55173	210671	375198		22493	75899	125184			46115	390010			97401	532365			62610	340871			121251	356010			24757	134844	9705		61100	234650		9522	60916	208480	38065	21812	58962	257137	80092		101533	761380	228459	353559
406.9642@0.9320954	Neurotensin 11-13	HMDB0013024	0.277821	155417	79156	79901	85857	172723	72330	65532	60348	139240	61884	62378	61225	154934	87766	74199	90583	130866	70919	61875	39013	138055		71075	77302	102600	51888	56837	56565	101040	59259	60053	48217	88914	56138	48009	49489	101498	30369	46766	45356	79235	38287	37073	48943	90371	34420
551.9272@0.9772927	Chenodeoxycholic acid disulfate	HMDB0000545	0.279089		137040	143120	69139				170902		81809	95131	77704		46712				88140		97015				64622			136272			141081	60881			82164	92071				70805				49346
501.9094@0.99167234	Isoglobotriaose	HMDB0006598	0.28037		164625	138181			171050					154549	166286		132379	90361	167414			71203				59477	122387			88445	210321		173719	126018			189742	156007	157209		151626	134896	61794		157054	183821	164872
1415.481@2.4855828	Ganglioside GD3 (d18:1/14:0)	HMDB0011871	0.296275	23331	25308	24769	25643		18151		26347	111180	88435		22772			22934	31499			40101	21755			36998		19413		28077	23819	19122	24928	26927				18395				27607				29144		28436
679.993@1.0539709	Cer(d18:0/26:0)	HMDB0011771	0.308754		55422	59447	53425		41864	27547	21171		44087	53851	42044		29148	51998	46958		32059	29435	20529			41383	30319		47127	55353	59961		46832	54451	16152		41812	20816	36512			27842	28089		36236	51522	45793		41454
914.1824@4.0319853	PIP(16:1/18:1)	HMDB0009941	0.30976	39482				36627	42885	31543	8748	28309	41117	35580		41825		28808	19465	43849	40843	37526	32027	32770		29821		33476					28724		25089	12967	21849			28313	20861	27563			12371	11039		18132	15970
589.418@6.816319	dTDP-4-acetamido-4,6-dideoxy-D-galactose	HMDB0012222	0.31061	14207	25551	35427	75768		22465	27205	34853	31050	34442	19398	69772	14194	40795	21085	47928	31163	22703	31905	92998	50790			60713	14082	13233	30076	63150	86705	12433	34834	52794	32766	25543	22961	25306	14569	76294	45059	27893	18695	22221	36736	92771	35022
461.0177@2.3737466	Glucosylsphingosine	HMDB0000596	0.317553		139777	388983	1138571		206678	249649	463605		171568	206823	822883		77907	134215	378711		78236	172770	1071457			214861	1225551		46229	73196	251877		79085	130876	678388		97707	191061	817400		127814	303265	1604141		95405	184624	557244		196051
652.1879@2.9273992	DG(20:2n6/0:0/20:5n3)	HMDB0056318	0.318775			36155																	52177				51510												96843								21985	15256
808.1895@3.043151	PI(16:0/16:1)	HMDB0009779	0.320679			16420	17605												30444				25843				33885				21547													21385	66513	78215	194064	136802	104485
650.2146@1.551113	SM(d18:0/12:0)	HMDB0012084	0.321675	19088	16409	18268	9642	17710	16505	13398		16485	16036	12658		19922	19475	13039		19806	17634	14334		17020		12903		18388		14754	12820	16934	15588	12782		12211	13626	14552	9086	14573	10437	10936		11329	14456	13880	10866	19881	12347
572.0414@0.8737692	Vitamin D2 3-glucuronide	HMDB0010344	0.329904		316933	359164	333399		380890	262159	65797		356368	281176	339044		128594	67994	56421		238363	280558	347297			183411	278610		125299	177126	95201		157053	104648	290402		200480	280348	158720		186492	215208	213911		163025	107491	140602		133860
944.2087@2.3126273	PIP(18:0/18:1)	HMDB0009949	0.33041		17290	28188	47971			17136				13502	40239			23105	46609			15598	33728			19303	38598				16665			17575	23258			12087	19961			14570	23724
602.1547@3.066446	DG(20:4/15:0/0:0)	HMDB0007503	0.337225	13891	16778	11841	9949	11146	15157	21615	17793	17937	10275	22493	52615	11151	13266	11564	53311	11933	13047	37497	51025	11052		29050	48065	18619	15521	22201	39364	19638	23136	11336	47684	15970	19781	33501	53123	8961		27531	42957			15324	40946	28353	36055
668.1961@3.8405004	DG(18:1/22:5/0:0)	HMDB0007236	0.341875	272524	10475		13269	10212	13263	10493						247574		228391	225498	229699		233113													197200
573.493@3.1164663	Biotinyl-5'-AMP	HMDB0004220	0.352317																																												20157
1058.2117@4.030332	Kinetensin 1-8	HMDB0012985	0.365683																																												39257
520.9566@0.8667368	LysoPC(18:1)	HMDB0002815	0.39154			38706	42923			38368			21778	38841			14006				37788	20655				33554	20639		13528	16866	11503		32095	12024	23844		23115	28266	30167		19989	36040	19000		15616	12790	14631		14969
542.9359@0.98641783	LysoPC(20:4)	HMDB0010395	0.396589		211563	186836			179391	192023	194103			225523			23755	255352	185468			106649	140809			79839	145133			224768	83132		216718	193290	50482		217065	113897	91505		16884		47367		185175	114831	126905
962.337@2.5089285	TG(20:2n6/20:5)/22:6)	HMDB0053613	0.399341	8030	9802	37875	38532		6914	13993	11298			8283	24594			10472	26272			14660	29017			14229	31154			8570	21634			8772	25251			16432	21495			9181	19955			8570		6342	9504
715.9595@1.4680418	PC(14:0/P-18:1)	HMDB0007898	0.40791								30983			66395												45778																22685					59877
632.1278@3.3036468	DG(18:1n9/0:0/18:2n6)	HMDB0056202	0.410175			24709	38757								14450				18369				24460				33628				13146				20322				18249				21054			37679	73961	47153	68568
645.061@0.8737999	PE(14:1)/P-16:0)	HMDB0008883	0.41234		111556	182728	141691		200346	171703			179668	109903	191971		199364	207213			148518	143941	223787			108149	156466			92374	157516			123444	177080			169386	21062			119927	134234				152770
734.0006@2.1336775	PC(16:0/16:0)	HMDB0000564	0.438445		269860	290440	126871		147312																				147627	216720			223191	130702			215361	134962			90559	160358			163538	124865	102086		202342
508.9018@0.9917442	LysoPC(17:0)	HMDB0012108	0.44634				38677			137197			132132	131360	84361		118873		120947			122018				105323	46973		25746		127557		118922	138277			112988	123727				41319				35030
431.3029@6.20374	3-(3,5-Diiodo-4-hydroxyphenyl)pyruvate	HMDB0059637	0.532646		21425	36541	32088		34732	37040	16205		36404	28475	29426		49731	32622	18284		27362	41065	37765			27668	31118		20762	34489	32406		28708	34607	52035		20324	41098	26250		42892	46879	31889		27776	23095	19500		25581
693.1467@4.7545934	DG(20:3/22:5/0:0)	HMDB0007467	0.608725			10099		10545	8659		7482	9914		9896	9432	9675		10110	9556	9052	9590	9768				10371	9341	9455	10057	11830	10914	11797	10816	11371		9710	9711	8341	10502	10873		8844	8601	12349		10373	7875		9307
534.1015@4.8709607	LysoPE(22:2/0:0)	HMDB0011522	0.75336			176868	303358			86281	108703			38253	263996			75079	242399			98514	279981			93690	235810				123549			22707	145856			41693	197887			36297	137914				83750		15505
738.3197@0.7209474	PC(P-16:0/18:4)	HMDB0011214	0.78376	295256	18003			260303	27728	196175	165310	385800	24498		212995	385001	65112	53888	25678	358917	27938	34607	294030	366741		28978	276548	393971	34222	30687	34278	399523	38055	29555	330640	333266	32705	283503	33411	403080	280612	40130	32196	415030	55689	37200	36793	550478	51311
684.273@0.76219183	PE(18:3/14:1)	HMDB0009119	0.820395	79846				73420				78065				85322				75155				83013				81928				77200				69382				76510								15936
1281.8044@0.95943636	Neurotensin 1-10	HMDB0013023	0.874219		243448	271591	276387		263390	305711	155469		273932	313353	256418				45052		285306	152283	223392			235775	287698		255357	249283	43833		195602		284624		236856		252735		133612		296353		209239	303991	22301		44306
1681.783@0.95181364	Ganglioside GT3 (d18:0/12:0)	HMDB0012052	0.925959		181935	167637	173967		158847	172848			157747	195713	162100		165169	40942			41965	38140	136832			173924	159480			192958	171956		157300	42254	162697		192601	174241	168520			173152	34766				85540		195014
558.1808@2.8663418	DG(14:1/18:4/0:0)	HMDB0007048		120148	121688	114437	95867	98061	96783	65813	41992	165226	165770	154362	158451	171775	167648	155135	148692	146401	163491	147343	137679	155304		144310	142073	186024	162332	175619	179328	179297	185649	175618	161432	153372	167713	166973	164983	178955	137000	168673	154953	444158	574152		241449	471949	358618
458.182@0.6028183	FMNH2N	HMDB0001142		111049	114391	113732	133888	115062	103012	92434	67628	130183	128738	121085	138991	145478	136340	115288	124677	124872	119328	107269	124363	126788		112376	133221	147134	115339	128535	144290	137366	148713	133087	158362	114653	128569	139585	148552	140743	111419	137098	149607	40559	44928	39839	48455	50809	40789
869.268@1.5595633	PC			107412	114144	38508		196165	107570	42273		167577	96498	49041		171826	177640	66312	33291	220409	162757	62376		216492		45592	35895	91196	63811	66510		88065	85659	60755		78859	81396			81295	42866
908.2224@4.3060164	TG					154647	416388								46471				147151				152165			38634	131166				15200		50680		90649									59399	87796	221100	3445651	270797	561170
1233.3206@4.0307813	unknown			9108	7647	10504	8024	7092	15442	10313			14000	10390		11757				13264	7803	10901	17098	7282				6860												7656
1260.8344@0.96095246	Unknown				403165	402801	385964		353858	391626			379419		414217		388007				80776		306039			472625	390780			429607	488061		427213		295623		348675	378448	415216			396527			96909		478368		471427
1690.7642@0.9473272	Unknown				133137	119623	142715		127852	135970			134392	145176	130866		135995		34654				104314			120564	134717			151271	70203			33588				132498	152204			133156	33881						119039
2089.727@0.9437501	Unknown				71714	83706	56977		128068	77384			73046		76386		69168				54723	68801	97442			65797	27475		61878	77757			15147	44416	86591		71956	88918				84240	66036		81398	65825	85586		76997
499.1344@1.0596857	Unknown			84013	78615	86348	84923	79590	76446	72785	52758	83683	75038	71605	77927	85144	79174	73154	79311	82346	76123	75276	77517	83901		66970	76702	85110	51413	70849	68434	80160	72136	69267	77304	71325	73542	52723	73372	80446	61566	71840	74973	68439	68456	63663	66867	79579	65945
	Where	a: SUSD2+	Numbers represent matching samples
		b: SUSD2-
[truncated: 42 more columns]
