# Supplementary material for: Exometabolomic Analysis of Decidualizing Human Endometrial Stromal and Perivascular Cells
Source: Front Cell Dev Biol. 2021 Jan 28;9:626619. doi: 10.3389/fcell.2021.626619 (PMC7876294; doi:10.3389/fcell.2021.626619)
Supplement: Supplementary file 9 [file Table_3.XLSX]

## Sheet: Table S3_Differential metabolit
Table S3 Differential metabolites over decidualization
	D0 vs D2		D0 vs D4		D0 vs D8
Compound	Fold Change	P-value	Fold Change	P-value	Fold Change	P-value		Key
1,2-Dehydrosalsolinol	2.76	<0.000012	3.35	1e-06	3.04	4.9e-05		Higher levels at D0 (Day 0)
12a-Hydroxy-3-oxocholadienate	17.59	<0.000032	19.89	<0.000001	18.25	<0.000001		Lower levels at D0 (Day 0)
17-Hydroxymethylethisterone			2.22	4.3e-05	4.5	<0.000001
19-Noraldosterone					66.25	<0.000001
1-Methylinosine					2.05	3.3e-05		P-value determined using holm-sidak multiple correction
2,3-Dinor-8iso prostaglandin F2alpha	3.95	<0.000020	4.44	<0.000001	4.08	<0.000001
20-Hydroxy-leukotriene E4					18.47	0.000594
20-Oxo-leukotriene E4					4.88	<0.000001
20-Trihydroxy-leukotriene-B4					0.6	<0.000001
2-Ketobutyric acid	2.41	<0.000006	2.87	<0.000001	2.7	<0.000001
2-Oxo-3-hydroxy-4-phosphobutanoate	4.51	<0.000022	10.97	<0.000001	31	<0.000001
3-(3,5-Diiodo-4-hydroxyphenyl)pyruvate	3.34	<0.000016	3.68	<0.000001	3.07	<0.000001
3-Hydroxy-3-carboxymethyl-adipate					0.37	4e-06
3-Hydroxyphenyl-valeric acid	21.51	<0.000033	22.39	<0.000001	23.47	<0.000001
5-Amino-3-oxohexanoate					2.31	1.4e-05
5-Taurinomethyl-2-thiouridine					5.03	<0.000001
7b-Hydroxy-3-oxo-5-cholanoate			2.16	2e-06	3.87	<0.000001
Adenosine thiamine triphosphate					8.47	<0.000001
alpha-CEHC			2.06	0.000177	3.29	<0.000001
beta-1-O-[N-(2-CH2OH-3-chlorophenyl)-Abz]-D-glucupyranuronic acid)					0.14	3e-06
beta-1-O-[N-(2-CH3-3-chlorophenyl-5-hydroxy) Abz]-D-glucupyranuronic acid					0.13	3e-06
Bilirubin glucuronide					7.21	0.000141
Cer(d18:0/26:0)	3.99	<0.000021	4.72	<0.000001	4.63	<0.000001
Chenodeoxycholic acid disulfate	3.9	<0.000019	3.88	0.00014	3.42	6e-06
CMP-N-glycoloylneuraminate					17.45	<0.000001
Creatine					0.57	0.000206
Cyclic AMP	3.14	<0.000013	3.48	3e-06	3.73	<0.000001
Deoxyuridine triphosphate			2.06	0.000239
Deuteroporphyrin IX					10	0.000112
DG(18:1n9/0:0/18:2n6)					7.95	0.000148
DG(20:4/15:0/0:0)					5.61	3e-05
Dolichyl phosphate D-mannose					4.87	<0.000001
Ethenodeoxyadenosine					4.29	0.000133
Ganglioside GT3 (d18:0/12:0)	5.43	<0.000026	7.53	<0.000001	6.19	4e-06
Glucosylsphingosine	5.26	<0.000025	10.39	<0.000001	39.93	<0.000001
Guanosine 2',3'-cyclic phosphate	3.46	<0.000018	5.17	<0.000001	7.44	<0.000001
Heme					11.18	6.2e-05
Hyaluronic acid					3.85	3.2e-05
Hypoxanthine			2.97	3.2e-05
Indoxyl sulfate	2.3	<0.000005	2.39	<0.000001	2.71	<0.000001
Inosine 2'-phosphate			4.27	<0.000001
Isoglobotriaose	3.23	<0.000015	3.38	<0.000001	3.69	<0.000001
Isorhamnetin 4'-O-glucuronide	0.22	<0.000001	0.25	<0.000001	0.22	<0.000001
Isovalerylglucuronide					2.33	6.4e-05
L-2-Hydroxyglutaric acid	2.52	<0.000009	3.13	<0.000001	2.89	<0.000001
Lactodifucotetraose					8.92	3e-06
Lactosamine					0.45	<0.000001
L-Aspartyl-4-phosphate	3.4	<0.000017	5.46	<0.000001	8.4	<0.000001
L-beta-aspartyl-L-glutamic acid	2.57	<0.000010	2.67	5.7e-05	2.64	0.00016
L-Phenylalanine	2.26	<0.000004	2.73	<0.000001	2.58	<0.000001
L-Threonine	2.42	<0.000007	3.15	<0.000001	2.87	<0.000001
LysoPC(17:0)			6.07	3e-06
LysoPC(18:1)	2.68	<0.000011	3.97	<0.000001	2.97	2.5e-05
LysoPC(20:3)					10.12	7.7e-05
LysoPC(20:4)	6.23	<0.000028	9.41	<0.000001	8.54	<0.000001
LysoPE(22:2/0:0)			6.32	0.000153	21.16	<0.000001
Malyl-CoA					0.47	8.7e-05
N-Acetylserotonin sulfate			6.07	<0.000001	11.52	<0.000001
Neurotensin 1-10	7.19	<0.000030	7.58	1.8e-05	8.62	<0.000001
Neurotensin 11-13	0.48	<0.000002	0.51	<0.000001	0.51	<0.000001
N'-Formylkynurenine	2.43	<0.000008	2.56	<0.000001	2.7	<0.000001
O-acetyl-ADP-ribose					7.11	0.000292
PC					0.23	0.000325
PC(16:0/16:0)	3.21	<0.000014
PC(20:1/22:1)					2.11	4.5e-05
PC(P-16:0/18:4)	0.17	<0.000001	0.25	2e-06	0.24	<0.000001
PE(14:1/14:1)					11.14	2e-06
PE(14:1/P-16:0)	7.81	<0.000031	9.89	<0.000001	10.98	<0.000001
PE(18:3/14:1)	0.12	<0.000001	0.12	<0.000001	0.12	<0.000001
Phenylalanyl-Aspartate					3.98	<0.000001
Phenylalanyl-Tyrosine	0.37	<0.000001	0.41	<0.000001	0.37	<0.000001
Phosphodimethylethanolamine					0.39	<0.000001
PIP(18:0/18:1)					3.4	0.000676
SM(d18:0/12:0)					0.39	<0.000001
SM(d18:0/20:0)					18	7.7e-05
TG(20:2n6/20:5/22:6)			2.69	8.3e-05	4.09	<0.000001
Thymidine 3',5'-cyclic monophosphate					13.27	0.000113
Thymidine 5'-triphosphate					23.85	0.000179
UDP-L-rhamnose			7.5	3.1e-05	18.68	<0.000001
Vitamin D2 3-glucuronide	5.81	<0.000027	6.12	<0.000001	5.7	<0.000001
