# Supplementary material for: Exometabolomic Analysis of Decidualizing Human Endometrial Stromal and Perivascular Cells
Source: Front Cell Dev Biol. 2021 Jan 28;9:626619. doi: 10.3389/fcell.2021.626619 (PMC7876294; doi:10.3389/fcell.2021.626619)
Supplement: Supplementary file 10 [file Table_4.XLSX]

## Sheet: Sheet1
Table S4 Differential metabolites between PVC and EnSC
D0
Metabolite	Fold Change	P value		Key
N2,N2-Dimethylguanosine	0.512021	0.0147084		Higher levels at D0 (Day 0)
				Lower levels at D0 (Day 0)
D2
Metabolite	Fold Change	P value
3-Hydroxy-9Z-octadecenoylcarnitine	0.464688	0.0335857
Biotinyl-5'-AMP	0.467596	0.00549946
MG(0:0/24:1(15Z)/0:0)	0.564218	0.0416845
N-Acetyl-9-O-lactoylneuraminic acid	0.554029	0.0315677
1,2-Dehydrosalsolinol	1.86841	0.0141887
2-(a-Hydroxyethyl)thiamine diphosphate	3.09258	0.0279539
2-Ketobutyric acid	2.03002	0.00939831
Chondroitin 6'-sulfate	2.36577	0.0118075
Creatine	2.00319	0.0239145
di-Hydroxymelatonin	2.00565	0.00616404
Epinephrine glucuronide	3.16861	0.0342171
Unknown	2.81484	0.0459881
L-Threonine	1.85479	0.0310219
Nonanoylcarnitine	2.07428	0.0268342
Phosphodimethylethanolamine	2.04209	0.0167548
PIP(16:1(9Z)/18:0)	1.86926	0.0481646
Tyrosyl-Glycine	2.53411	0.0105387
Unknown_c	1.83362	0.0283822
D4
Metabolite	Fold Change	P value
1-Phosphatidyl-1D-myo-inositol 3-phosphate	0.600727	0.0462785
6-Phosphogluconic acid	0.414139	0.00346293
MG(0:0/24:1(15Z)/0:0)	0.543174	0.0189999
Chenodeoxycholic acid disulfate	2.10302	0.00980931
Formylkynurenine	1.82656	0.0358193
SM(d18:0/12:0)	1.79683	0.0077788
D8
Metabolite	Fold Change	P value
(S)-5-Amino-3-oxohexanoate	0.301498	0.00159821
1-Methylinosine	0.362571	0.00346176
Ethenodeoxyadenosine	0.393458	0.0276464
Pyridinoline	0.407707	0.00832853
Deoxyinosine	2.14607	0.00202439
Ganglioside GT3 (d18:0/12:0)	2.02467	0.00831656
Hypoxanthine	2.11988	0.00331763
Lactosamine	1.68864	0.04801
SM(d18:0/12:0)	1.62524	0.0103031
