# Supplementary material for: Exometabolomic Analysis of Decidualizing Human Endometrial Stromal and Perivascular Cells
Source: Front Cell Dev Biol. 2021 Jan 28;9:626619. doi: 10.3389/fcell.2021.626619 (PMC7876294; doi:10.3389/fcell.2021.626619)
Supplement: Supplementary file 11 [file Table_5.XLSX]

## Sheet: Table S7 Targeted LCMS analysis
Table S5 Targeted LC-MS analysis of the purine metabolites: adenosine, xanthine, inosine and hypoxanthine in PVC and EnSC.
Sample	Cell Type and Day	Matching Sample Identifier	Signal Intensity
			adenosine	hypoxanthine	xanthine	inosine		Where	a: SUSD2+	Numbers represent matching samples
1	SUSD2+ con	1a	151549	2.72485e+07	11828.1	1.55692e+06			b: SUSD2-
2	SUSD2+ D2	1a	456103	1.6683e+07	6513.61	1.82341e+06
3	SUSD2+ D4	1a	1.07413e+06	1.83974e+07	22744.7	2.34056e+06
4	SUSD2+ D8	1a	1.7697e+06	2.03334e+07	42809.8	2.57532e+06		Where	SUSD2+	PVC
5	SUSD2- con	1b	324319	2.21505e+07	13671.4	766190			SUSD2-	EnSC
6	SUSD2- D2	1b	709600	1.50826e+07	15514.7	997669
7	SUSD2- D4	1b	2.68197e+06	2.28628e+07	29712.3	2.67406e+06
8	SUSD2- D8	1b	1.21945e+06	1.77015e+07	43717.1	1.52119e+06
9	SUSD2+ con	2a	90724.6	1.84033e+07	5700.27	1.03727e+06
10	SUSD2+ D2	2a	478853	2.01684e+07	6182.28	2.45973e+06
11	SUSD2+ D4	2a	306178	1.04056e+07	5800.16	1.19539e+06
12	SUSD2+ D8	2a	466579	1.64631e+07	26302.9	2.58758e+06
13	SUSD2- con	2b	151468	2.80756e+07	44251.6	1.23378e+06
14	SUSD2- con	2b	369240	3.01085e+07	31357.4	2.2087e+06
15	SUSD2- con	2b	323707	2.17726e+07	61816.8	1.52303e+06
16	SUSD2- con	2b	295293	1.87976e+07	100307	1.70204e+06
17	SUSD2- con	3a	74412.2	3.10123e+07	7959.74	1.64354e+06
18	SUSD2- con	3a	347234	2.63143e+07	5027.23	2.24607e+06
19	SUSD2- con	3a	302225	1.01967e+07	8231.23	1.6832e+06
20	SUSD2- con	3a	303739	9.99584e+06	16055.9	1.29357e+06
21	SUSD2- con	3b	99322.6	2.3902e+07	118528	1.19201e+06
22	SUSD2- con	3b	370841	2.00471e+07	90277.1	1.63305e+06
23	SUSD2- con	3b	533184	1.4967e+07	132847	1.63314e+06
24	SUSD2- con	3b	367140	1.09545e+07	171492	957299
25	SUSD2- con	4a	43631.1	2.04324e+07	5282.64	1.22437e+06
26	SUSD2- con	4a	913590	3.59392e+07	8211.47	2.36701e+06
27	SUSD2- con	4a	1.01037e+06	2.1344e+07	7136.98	1.59001e+06
28	SUSD2- con	4a	1.02306e+06	1.39744e+07	78763.9	1.92575e+06
29	SUSD2- con	4b	46046.7	1.68318e+07	45149.4	1.12004e+06
30	SUSD2- con	4b	946839	3.36291e+07	48246.9	2.58744e+06
31	SUSD2- con	4b	139333	1.22574e+07	47955.1	1.41683e+06
32	SUSD2- con	4b	634711	1.90756e+07	95384.7	1.96792e+06
33	SUSD2- con	5a	42335	2.066e+07	7981.8	1.89923e+06
34	SUSD2- con	5a	449386	1.50191e+07	5408.42	2.22251e+06
35	SUSD2- con	5a	496372	1.8025e+07	12178.3	3.48076e+06
36	SUSD2- con	5a	511613	1.40549e+07	30556.4	2.4069e+06
37	SUSD2- con	5b	47332.3	1.99525e+07	64557	1.82704e+06
38	SUSD2- con	5b	360913	1.66646e+07	39211.9	2.22076e+06
39	SUSD2- con	5b	360060	1.31741e+07	47993.9	2.36583e+06
40	SUSD2- con	5b	449161	1.09419e+07	89268.4	1.55443e+06
41	SUSD2- con	6a	38436.1	2.93927e+07	19466.1	2.0377e+06
42	SUSD2- con	6a	1.82139e+06	3.65961e+07	23205.2	3.37738e+06
43	SUSD2- con	6a	985351	1.61565e+07	20364.6	1.96685e+06
44	SUSD2- con	6a	1.07113e+06	2.72002e+07	76395.2	3.3599e+06
45	SUSD2- con	6b	39970.8	1.58847e+07	71396.9	1.16912e+06
46	SUSD2- con	6b	715621	1.56285e+07	65007.6	1.55365e+06
47	SUSD2- con	6b	1.49117e+06	1.61834e+07	79150.3	1.79306e+06
48	SUSD2- con	6b	505389	1.27611e+07	113634	1.52372e+06
49	SUSD2- con	7a	139183	2.35561e+07	22349.4	1.63181e+06
50	SUSD2- con	7a	1.12775e+06	2.16669e+07	15671.9	1.77675e+06
51	SUSD2- con	7a	934028	1.17917e+07	15251	1.5495e+06
52	SUSD2- con	7a	459424	1.59059e+07	41577.9	1.60437e+06
53	SUSD2- con	7b	28933.5	1.52874e+07	53114.9	962678
54	SUSD2- con	7b	484286	1.57719e+07	40113.5	1.85729e+06
55	SUSD2- con	7b	350263	8.88568e+06	48831.5	1.10858e+06
56	SUSD2- con	7b	794585	2.67422e+07	124530	1.99582e+06
57	SUSD2- con	8a	65445	1.86036e+07	9726.64	969011
58	SUSD2- con	8a	778124	2.20431e+07	9505.15	1.60182e+06
59	SUSD2- con	8a	759906	1.54553e+07	10609.6	1.69839e+06
60	SUSD2- con	8a	483102	1.54419e+07	25720.2	2.31064e+06
61	SUSD2- con	8b	43839.7	1.85657e+07	58668.2	1.10537e+06
62	SUSD2- con	8b	668211	2.85623e+07	68752.6	2.30248e+06
63	SUSD2- con	8b	461015	9.62339e+06	46473.8	1.05612e+06
64	SUSD2- con	8b	490373	1.84097e+07	119230	2.00498e+06
65	SUSD2- con	9a	137665	2.59075e+07	25358.6	1.89382e+06
66	SUSD2- con	9a	755637	2.07465e+07	19683	1.92797e+06
67	SUSD2- con	9a	3.12603e+06	3.29081e+07	30085.6	3.97475e+06
68	SUSD2- con	9a	638587	1.22311e+07	31721.1	2.13784e+06
69	SUSD2- con	9b	6307.5	1.40325e+06	8510.53	56110.2
70	SUSD2- con	9b	689498	1.12805e+07	160793	1.07649e+06
71	SUSD2- con	9b	930189	1.0706e+07	174223	1.20617e+06
72	SUSD2- con	9b	277673	1.04125e+07	187958	1.07467e+06
73	SUSD2- con	10a	377165	1.02858e+07	19053	1.29694e+06
74	SUSD2- con	10a	1.85227e+06	1.28763e+07	30029.8	2.63256e+06
75	SUSD2- con	10a	165252	1.85167e+07	22211.4	1.07895e+06
76	SUSD2- con	10a	768496	9.73242e+06	47814.3	987344
77	SUSD2- con	10b	76015.1	2.08647e+07	130029	1.29547e+06
78	SUSD2- con	10b	792043	1.15329e+07	79123.6	1.1568e+06
79	SUSD2- con	10b	1.51353e+06	1.26816e+07	138619	1.70787e+06
80	SUSD2- con	10b	651803	1.21596e+07	164692	962771
81	SUSD2- con	11a	154652	2.1896e+07	14197.8	1.74498e+06
82	SUSD2- con	11a	455316	1.30858e+07	9482.51	1.27667e+06
83	SUSD2- con	11a	990569	1.32676e+07	10731.7	1.62847e+06
84	SUSD2- con	11a	1.51839e+06	2.02102e+07	32827.8	2.92294e+06
85	SUSD2- con	11b	204043	3.14573e+07	30646.9	1.75649e+06
86	SUSD2- con	11b	1.25499e+06	2.8558e+07	32466.2	2.46587e+06
87	SUSD2- con	11b	826082	1.04545e+07	28391.2	1.54019e+06
88	SUSD2- con	11b	660075	2.12643e+07	18653.7	2.62165e+06
89	SUSD2- con	12a	114465	1.81129e+07	10859.4	2.34384e+06
90	SUSD2- con	12a	802493	2.477e+07	11179.8	5.60197e+06
91	SUSD2- con	12a	842922	1.32057e+07	14211.2	4.52918e+06
92	SUSD2- con	12a	2.18778e+06	1.92557e+07	41531.3	5.45222e+06
93	SUSD2- con	12b	138918	2.00136e+07	49867.7	2.5132e+06
94	SUSD2- con	12b	470395	1.18997e+07	32795.7	3.47965e+06
95	SUSD2- con	12b	1.17835e+06	1.63707e+07	75286.6	5.1584e+06
96	SUSD2- con	12b	1.47573e+06	1.41578e+07	103203	2.78473e+06
2020-02-01	SUSD2- con	1a	74105.8	1.96737e+07	8095.83	864173
2020-02-07	SUSD2- con	1b	1.24713e+06	1.35596e+07	23573.6	1.29027e+06
2020-02-10	SUSD2- con	2a	322670	1.50308e+07	4260.46	1.4688e+06
2020-02-14	SUSD2- con	2b	160156	1.69002e+07	24328.5	1.0708e+06
2020-02-22	SUSD2- con	3b	229185	1.63824e+07	73588.6	1.07378e+06
2020-02-26	SUSD2- con	4a	421376	1.72515e+07	4921.34	1.15731e+06
30-2	SUSD2- con	4b	223814	1.39468e+07	26906.9	988543
42-2	SUSD2- con	6a	636031	1.57814e+07	14264.9	1.50168e+06
43-2	SUSD2- con	6a	573947	1.22477e+07	17653.5	1.48768e+06
47-2	SUSD2- con	6b	1.04855e+06	1.25077e+07	71743.7	1.20864e+06
50-2	SUSD2- con	7a	387566	1.08298e+07	12522.4	933940
62-2	SUSD2- con	8b	312246	1.15988e+07	37156	996557
64-2	SUSD2- con	8b	288977	1.29059e+07	100814	1.26402e+06
67-2	SUSD2- con	9a	1.18807e+06	1.41918e+07	18904	1.67999e+06
69-2	SUSD2- con	9b	7131.82	2.01025e+06	19961	91396.5
79-2	SUSD2- con	10b	695079	7.31076e+06	105436	866137
86-2	SUSD2- con	11b	373517	1.12673e+07	16756	1.00104e+06
90-2	SUSD2- con	12a	294860	1.21859e+07	7277.06	2.52513e+06
92-2	SUSD2- con	12a	1.16e+06	1.32556e+07	35640.9	3.6698e+06
blank_1			5815.38		78.2343	3539.14
blank_2			14163.5	6513.6	177.806	376.263
QC 1ul-1			1.23731e+06	3.01876e+07	73016.4	5.59286e+06
QC 1ul-2			992106	2.50595e+07	69598.6	2.98461e+06
QC 1ul-3			789692	1.97915e+07	55608.7	2.28838e+06
QC v7 2UL-1			7139.28	1.21379e+06	81694.8	2.48822e+06
QC v7 TS 2UL-1			8941.39	1.47796e+06	96283.4	3.05117e+06
QC v7 TS 2UL-2			7935.2	1.25264e+06	81707.3	2.98304e+06
QC v7 TS 2UL-3			7688.02	1.26889e+06	77913.8	3.11414e+06
QC0			758001	1.8853e+07	57892.9	2.41456e+06
QC1			1.19242e+06	3.01326e+07	68508.7	3.02066e+06
QC10			380525	1.24828e+07	46887.4	1.51182e+06
QC11			458311	1.38065e+07	45792.4	1.76331e+06
QC12			410373	1.44926e+07	50996.3	1.66853e+06
QC12_0			574020	299757	64630.2	1.12867e+06
QC13			421368	1.54446e+07	43974.2	1.39758e+06
QC2			788752	1.98897e+07	53470.2	2.2165e+06
QC3			556014	1.53448e+07	44812.7	1.65824e+06
QC4			840270	2.26229e+07	54129.4	3.15242e+06
QC5			509151	1.43637e+07	44440.7	1.62689e+06
QC6			569425	1.54748e+07	49555.6	1.79259e+06
QC7			500393	1.47377e+07	48100.7	1.69168e+06
QC8			470851	1.46993e+07	45309.4	1.68411e+06
QC9			337306	1.12546e+07	39459.8	785670
std mix TS 1ul-1			1.11941e+06	372324	91.8484	61810.9
